# Supplementary material for: Study of the mechanoluminescence and ‘aggregation-induced emission enhancement’ properties of a new conjugated oligomer containing tetraphenylethylene in the backbone: application in the selective and sensitive detection of explosive
Source: Royal Society of Chemistry journal article supplement (doi:10.1039/c8py01153b), 2018-01-01
Supplement: c8py01153b1.pdf [file c8py01153b1.pdf]

# Study of the mechanoluminescence and 'aggregation induced emission' Properties of a new conjugated oligomer containing tetraphenylethylene in the backbone: application in the selective and sensitive detection of explosives

Sengottuvelu Dineshkumar and Inamur Rahaman Laskar

## Graphical abstract

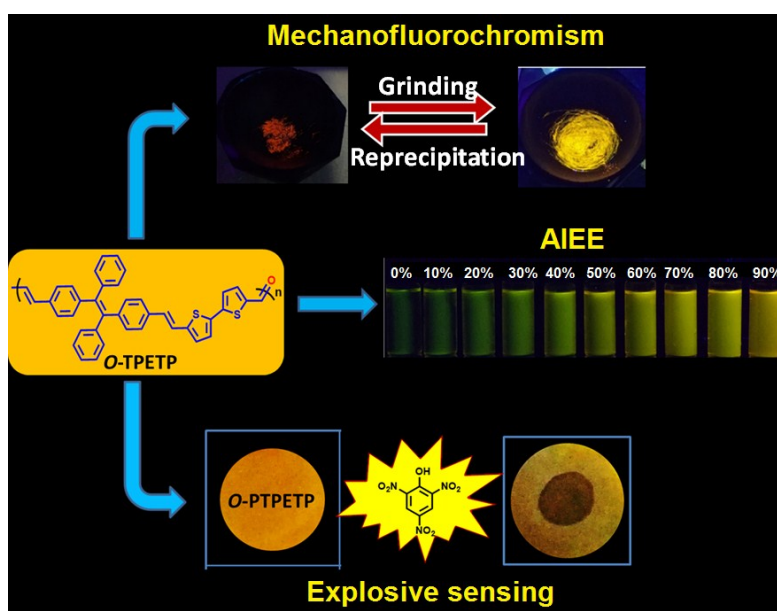

## Table of contents

1. Fig. S1.  $^1\text{H}$  NMR spectrum of 1
2. Fig. S2.  $^{13}\text{C}$  NMR spectrum of 1
3. Fig. S3.  $^1\text{H}$  NMR spectrum of 2
4. Fig. S4.  $^{13}\text{C}$  NMR spectrum of 2
5. Fig. S5.  $^1\text{H}$  NMR spectrum of 3
6. Fig. S6.  $^1\text{H}$  NMR spectrum of 4
7. Fig. S7.  $^1\text{H}$  NMR spectrum of oTPETP oligomer
8. Fig. S8.  $^{13}\text{C}$  NMR spectrum of oTPETP oligomer
9. Fig. S9. Mass spectrum of compound 1
10. Fig. S10. Mass spectrum of compound 2
11. Fig. S11. Mass spectrum of compound 4
12. Fig. S12. Average particle size distribution of oTPETP at 90% aggregates in THF/Water mixture
13. Fig. S13. (a) PL spectra of PTPETHio in THF/PEG mixed solvents with different water fractions ( $f_{\text{PEG}}$ ) with excitation at 445 nm; and (b) the changes of the PL intensity with different  $f_{\text{PEG}}$  excitation at 445 nm. (c) Photographs of PTPETHio in THF/PEG mixtures with different fractions of PEG taken under UV illumination.
14. Fig. S14. PXRD patterns of pristine and ground samples

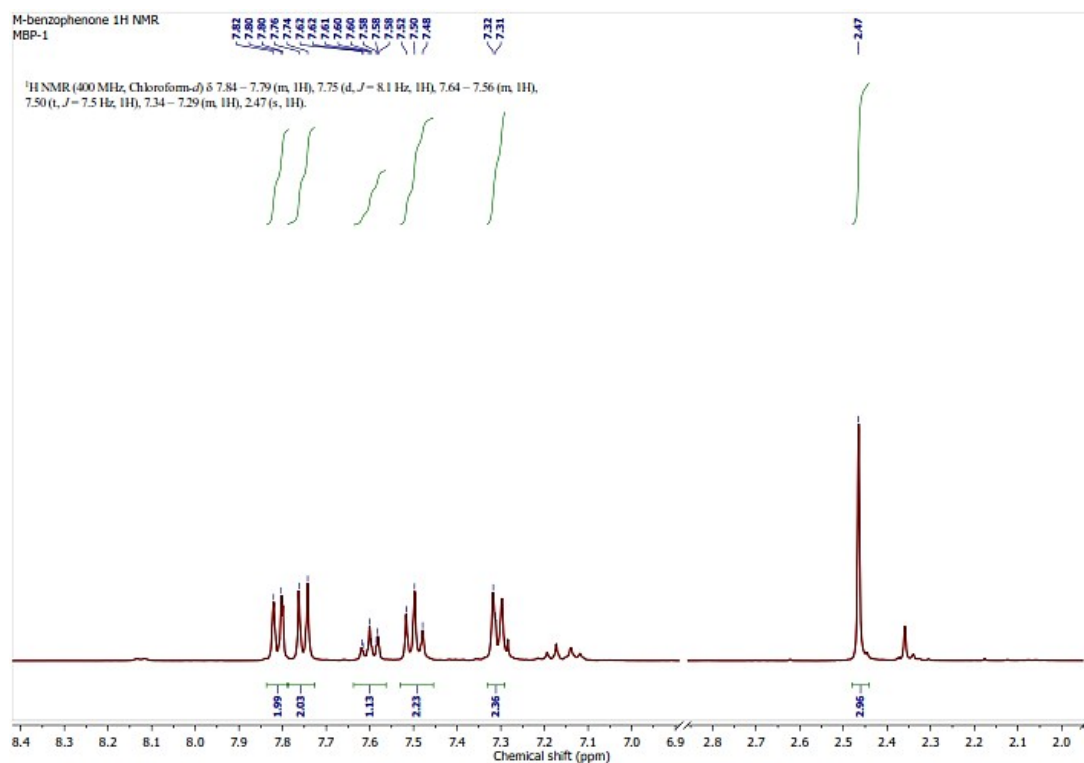

**Fig. S1.** <sup>1</sup>H NMR spectrum of 1

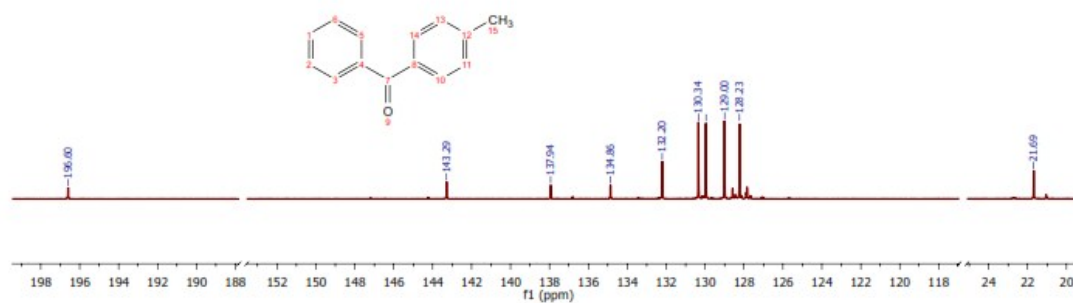

**Fig. S2.** <sup>13</sup>C NMR spectrum of 1

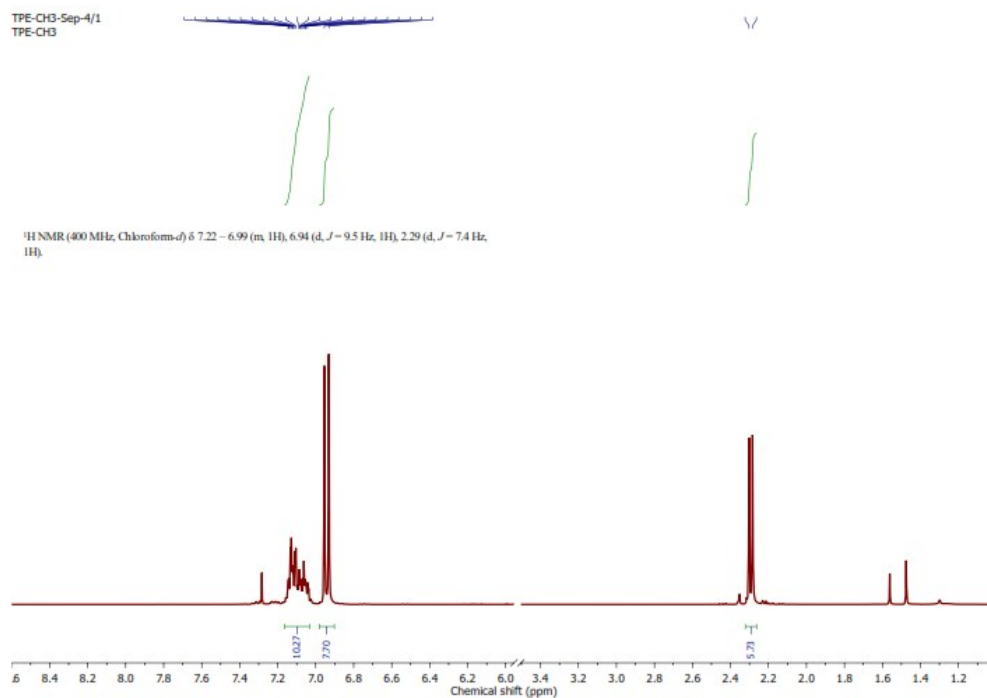

**Fig. S3.**  $^1\text{H}$  NMR spectrum of 2

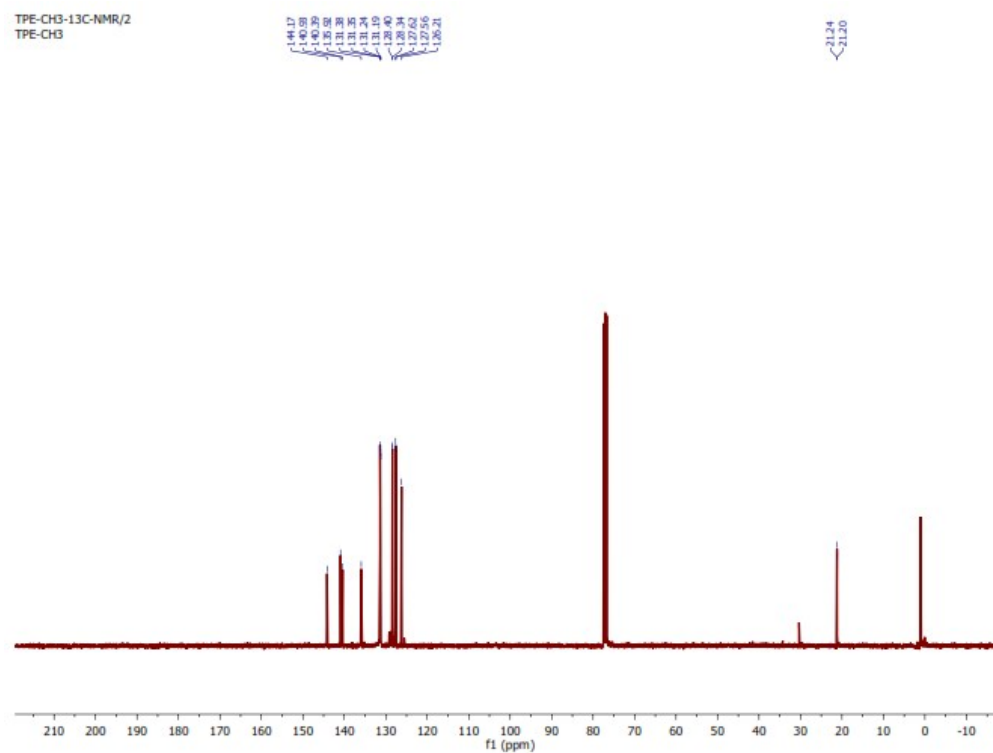

**Fig. S4.**  $^{13}\text{C}$  NMR spectrum of 2



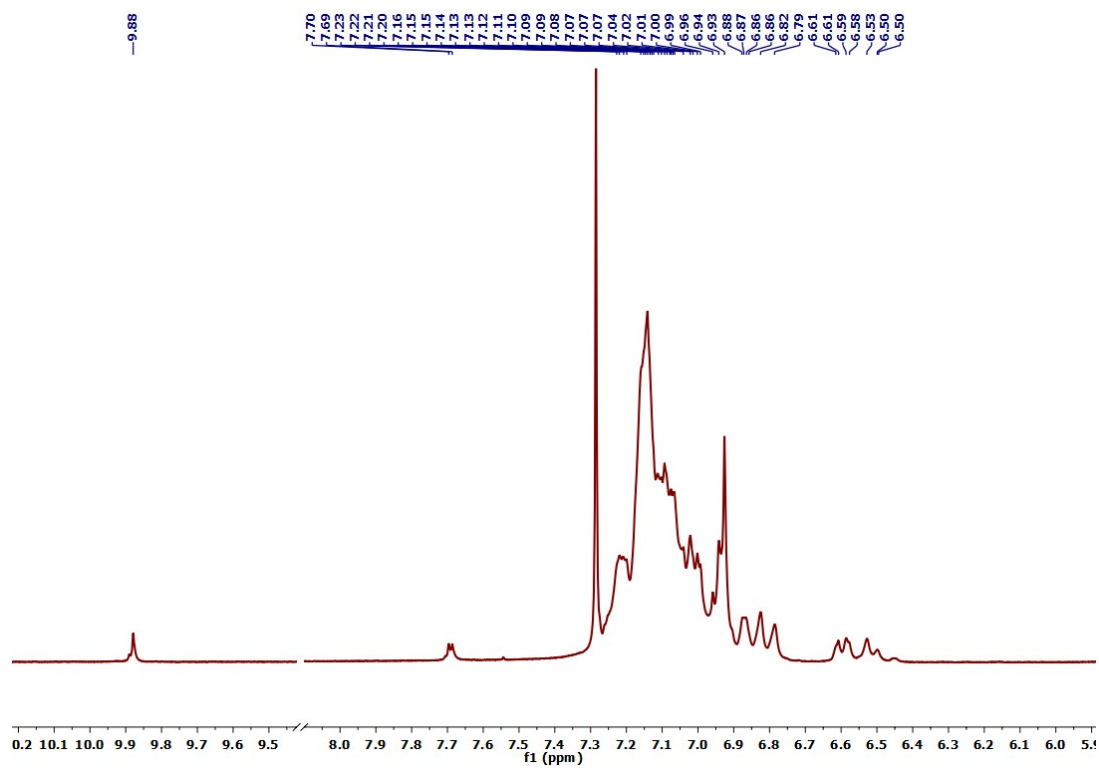

**Fig. S7.** <sup>1</sup>H NMR spectrum of oTPETPoligomer

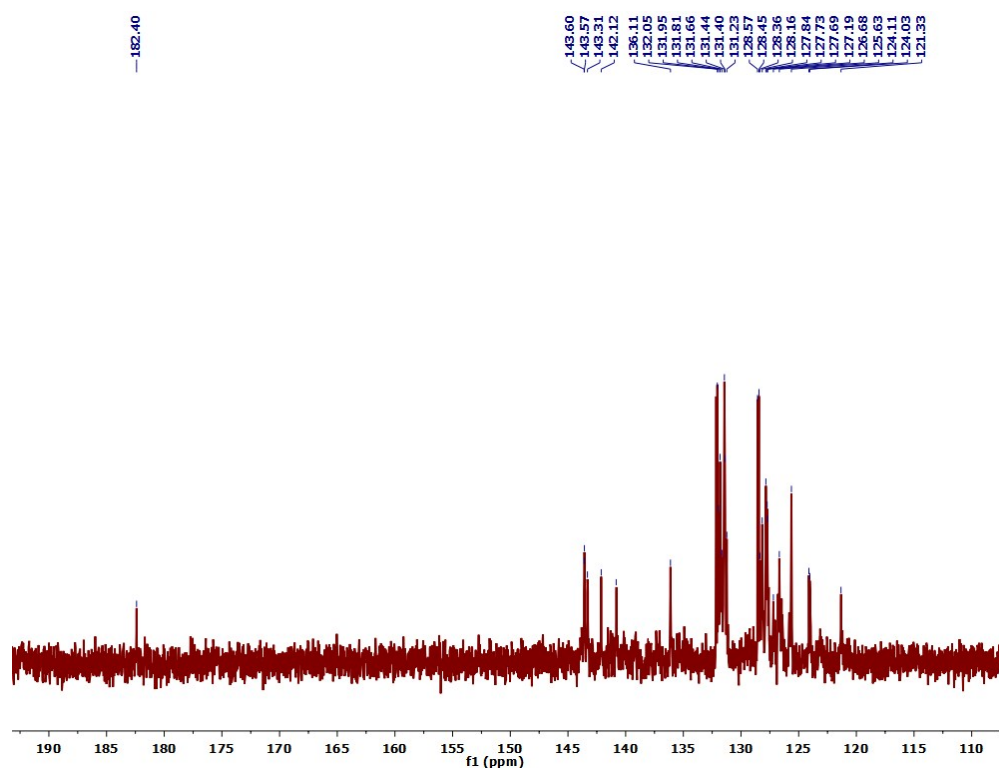

**Fig. S8.** <sup>13</sup>C NMR spectrum of oTPETPoligomer

MS Zoomed Spectrum

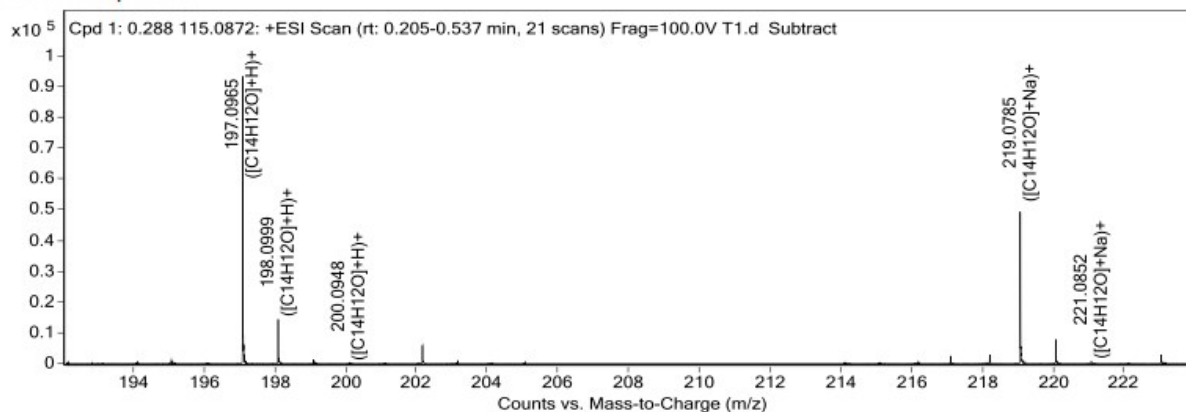

Fig. S9. Mass spectrum of compound 1

MS Zoomed Spectrum

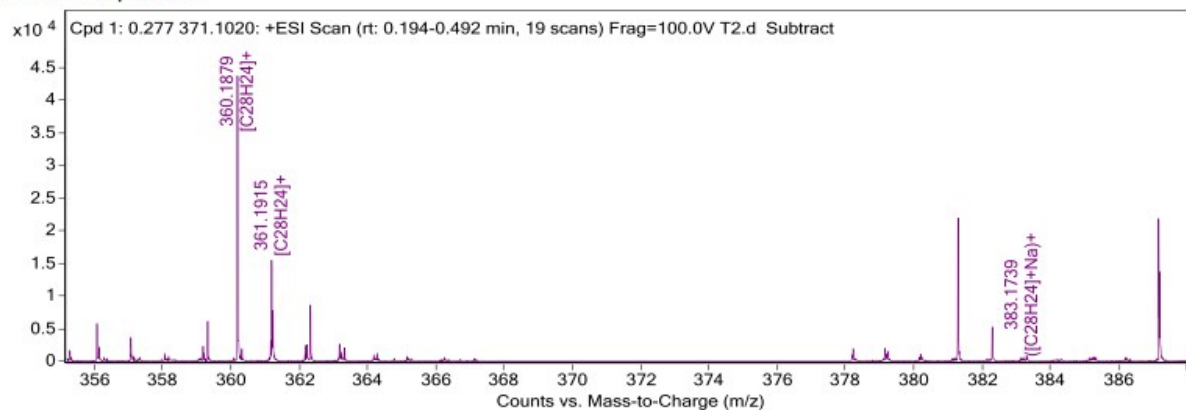

Fig. S10. Mass spectrum of compound 2

# MS Zoomed Spectrum

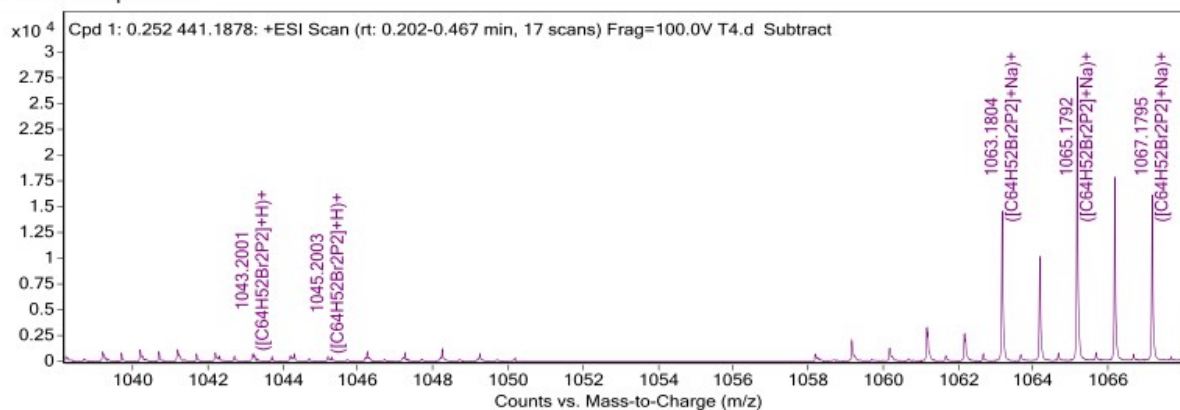

**Fig. S11.** Mass spectrum of compound 4

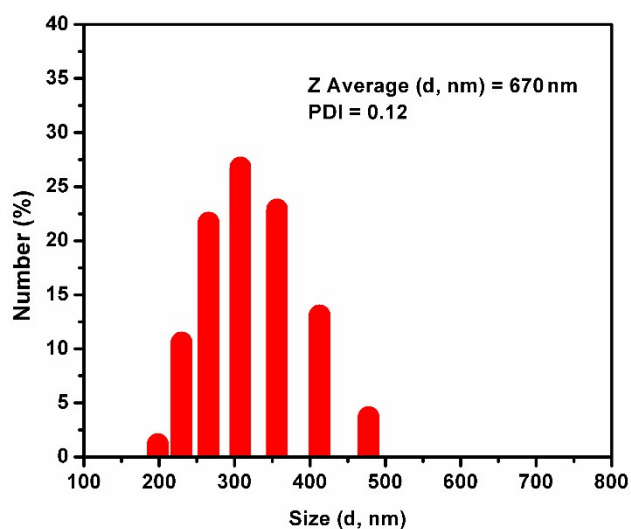

**Fig. S12.** Average particle size distribution of oTPETPat 90% aggregates in THF/Water mixture

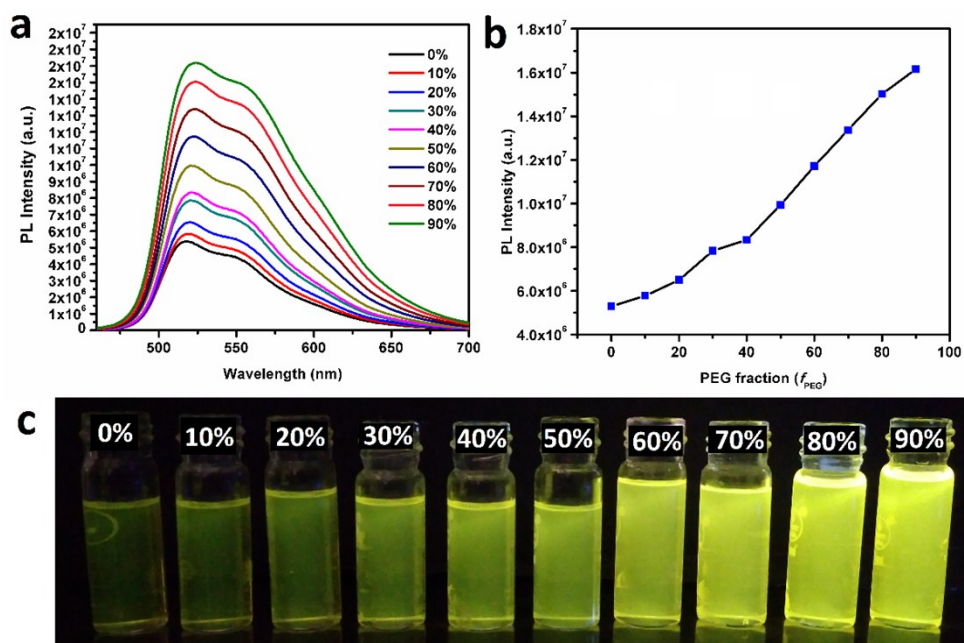

**Fig. S13** (a) PL spectra of **oTPETP** in THF/PEG mixed solvents with different water fractions ( $f_{\text{PEG}}$ ) with excitation at 445 nm; and (b) the changes of the PL intensity with different  $f_{\text{PEG}}$  excitation at 445 nm. (c) Photographs of **oTPETP** in THF/PEG mixtures with different fractions of PEG taken under UV illumination.

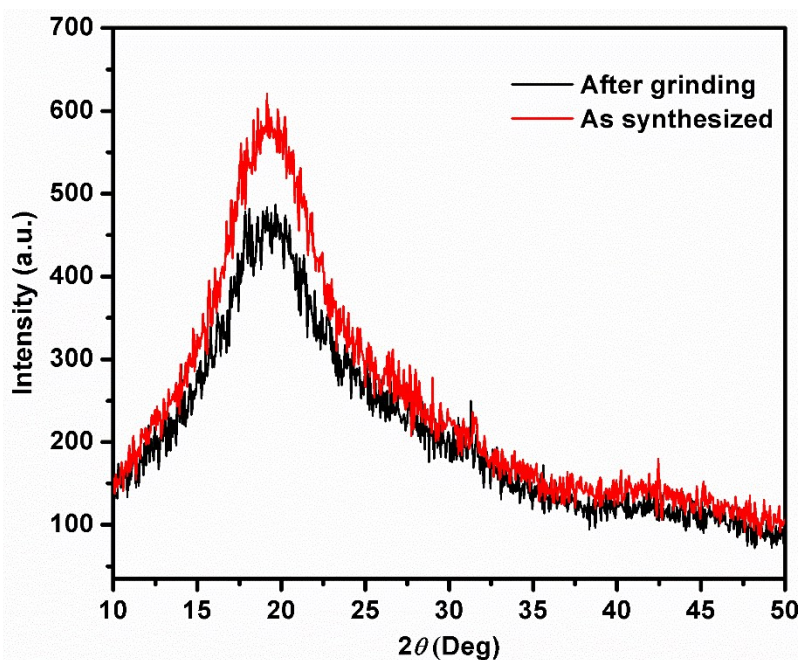

**Fig. S14** PXRD patterns of pristine and ground **oTPETP** oligomer samples.
